# Supplementary material for: Co-Produced Care in Veterinary Services: A Qualitative Study of UK Stakeholders’ Perspectives
Source: MDPI journal article supplement (doi:10.3390/vetsci7040149), 2020-10-01
Supplement: s1 [file s1]

## Co-produced veterinary services

### Interview questions- Client version (veterinary services)

| Question                                                                                                                  | Probing/ prompts questions<br>Questioning technique                                                                                                                                       |
|---------------------------------------------------------------------------------------------------------------------------|-------------------------------------------------------------------------------------------------------------------------------------------------------------------------------------------|
| Opening question:<br>Tell me a bit about yourself, your profession, your animals, and your experience of keeping animals. |                                                                                                                                                                                           |
| <b>Veterinarian Service Questions</b>                                                                                     |                                                                                                                                                                                           |
| Tell me about the veterinarian that you currently use.                                                                    | What do you use them for ?<br>Have you used them for a long time?<br>How did you find them/ select them?<br>Recommendations/ advocates.                                                   |
| What qualities are you looking for in the veterinarian?                                                                   | Personal qualities.<br>Price.<br>Location.<br>Specialism.                                                                                                                                 |
| When did you last have the veterinarian out and why?                                                                      | How easy was it to make the appointment?<br>Talk me through the appointment / process.                                                                                                    |
| What, if any, expectations do you have of the veterinarian before the appointment / or their arrival ?                    | Practitioner personal qualities.<br>Appearance.<br>Communication.                                                                                                                         |
| What, if any, expectations do you have of the service beforehand?                                                         | Open questioning                                                                                                                                                                          |
| How do you know that they have done a good job?                                                                           | Do they ever ask you if you are happy with the service they provide?<br>How do you rate the service they offer?                                                                           |
| Do you feel that you get value for money?                                                                                 | Can you outline your thoughts ?<br>Why do you feel this way?                                                                                                                              |
| Has there ever been an occasion when a treatment has been unsuccessful?                                                   | <i>Critical incident discussion</i><br>What happened?<br>Why have you felt let down?<br>Have you ever sought a 2 <sup>nd</sup> opinion? What may make you seek a 2 <sup>nd</sup> opinion? |
| Has there ever been an occasion when a treatment has surpassed all of your expectations?                                  | <i>Critical incident discussion</i><br>What happened?<br>Can you explain why you feel this way?<br>What did the veterinarian do to make you feel this way?                                |

## Interview questions- Client version (allied animal health services)

| Question                                                                                                                                                                | Probing/ prompts questions<br>Questioning technique                                                                                                                             |
|-------------------------------------------------------------------------------------------------------------------------------------------------------------------------|---------------------------------------------------------------------------------------------------------------------------------------------------------------------------------|
| <b>Allied Animal Health Practitioner Service Questions</b>                                                                                                              |                                                                                                                                                                                 |
| Tell me about the/an allied animal health practitioner that you currently use.                                                                                          | What do you use them for ?<br>Have you used them for a long time?<br>How did you find them/ select them?<br>Recommendations/ advocates.                                         |
| What qualities are you looking for in the allied animal health practitioner ?<br>NB Clients may wish to refer to a specific group of practitioners.                     | Personal qualities.<br>Price.<br>Location.<br>Specialism.                                                                                                                       |
| When did you last have the allied animal health practitioner out and why?                                                                                               | How easy was it to make the appointment?<br>Talk me through the appointment / process?                                                                                          |
| What, if any, expectations do you have of the allied animal health practitioner before the appointment / or their arrival ?                                             | Practitioner personal qualities.<br>Appearance.                                                                                                                                 |
| What, if any, expectations do you have of the service beforehand.                                                                                                       | Open questioning                                                                                                                                                                |
| How do you know that they have done a good job?                                                                                                                         | Do they ever ask you if you are happy with the service they provide?<br>How do you rate the service they offer?                                                                 |
| Do you feel that you get value for money?                                                                                                                               | Can you outline your thoughts ?<br>Why do you feel this way?                                                                                                                    |
| Has there ever been an occasion when a treatment has been unsuccessful?                                                                                                 | <i>Critical incident discussion</i><br>What happened?<br>Can you explain why you feel this way?<br>What did the allied animal health practitioner do to make you feel this way? |
| Has there ever been an occasion when a treatment has surpassed all of your expectations?                                                                                | <i>Critical incident discussion</i><br>What happened?<br>Can you explain why you feel this way?<br>What did the allied animal health practitioner do to make you feel this way? |
| <b>Team working questions</b><br>Has there ever been an occasion when the vet has worked with the allied animal health practitioner?                                    | How did that work out for you?<br>What was the service like?<br>Was it easy to organise?                                                                                        |
| <b>Closing Question</b><br>Is there anything that you would like to add which you feel we have not covered today but is relevant to the service that you have received? |                                                                                                                                                                                 |

## Interview questions – Professional version

| Question                                                                                                                                                     | Probing/ prompts questions<br>Questioning technique                                                                                                             |
|--------------------------------------------------------------------------------------------------------------------------------------------------------------|-----------------------------------------------------------------------------------------------------------------------------------------------------------------|
| Opening question:<br>Tell me a bit about yourself, your training, and your profession.                                                                       |                                                                                                                                                                 |
| <b>Your Clients</b>                                                                                                                                          |                                                                                                                                                                 |
| Tell me about your client base.                                                                                                                              | Who are your clients?<br>Describe your typical client.<br>How many clients do you regularly see?<br>Is the client base loyal?                                   |
| What do you think your clients want from your service?                                                                                                       | How you know what your clients want?<br>Do you meet these needs?                                                                                                |
| What expectations do you think that your client has of you as a professional?                                                                                | Where appropriate, does this vary for different groups of clients?                                                                                              |
| What personal qualities do you think the client seeks in the veterinarian/ allied animal health practitioner?                                                | What makes you think that those qualities are important?                                                                                                        |
| Have you had a situation where an appointment/consultation/ treatment has not worked out or gone to plan?                                                    | Critical incident discussion<br>What happened?<br>How did you feel? How did the client feel/respond?<br>What was the outcome ?                                  |
| Have you had a situation where a treatment/ appointment worked particularly well?                                                                            | Critical incident discussion<br>What happened?<br>How did you feel? How did the client feel/respond?<br>What was the outcome ?                                  |
| How do you provide a quality service?                                                                                                                        | What is service quality in your profession?                                                                                                                     |
| How closely matched is your service to what you perceive to the ideal?                                                                                       | Why do you hold that opinion?                                                                                                                                   |
| In your profession, tell me how you feel the services have changed?                                                                                          | Client expectations.<br>Changed in a positive or negative way.<br>Sustainable change.                                                                           |
| <b>Team working questions</b><br>In your daily role do you work with specialists colleagues (interdisciplinary working)                                      | How does this work out for you?<br>If there are any omissions why don't you work with this group?<br>How easy do find referring clients to other professionals? |
| <b>Closing Question</b><br>Is there anything that you would like to add which you feel we have not covered today but is relevant to the service you provide? |                                                                                                                                                                 |
